# Supplementary figures and images for: Clinical utility analysis of the Hoxb8 mast cell activation test for the diagnosis of peanut allergy
Source: PubMed Central journal article supplement — Allergy. 2024 Sep 28;80(1):215–26. doi: 10.1111/all.16341 (PMC11724244; doi:10.1111/all.16341), 2024-09-28

Figure S1

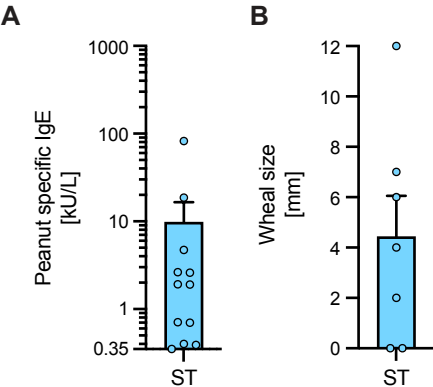

Figure S2

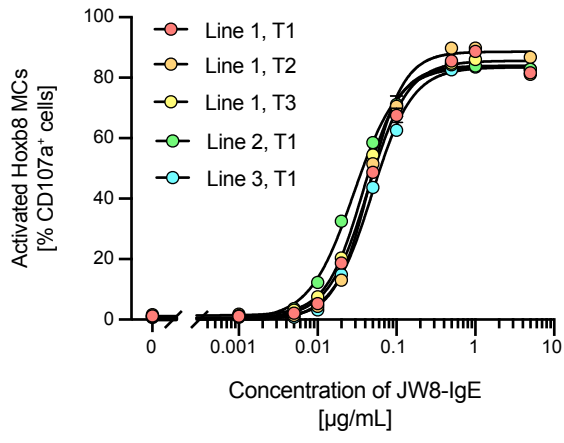

Figure S3

A

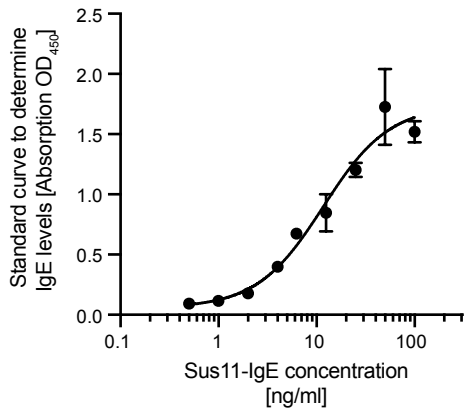

B

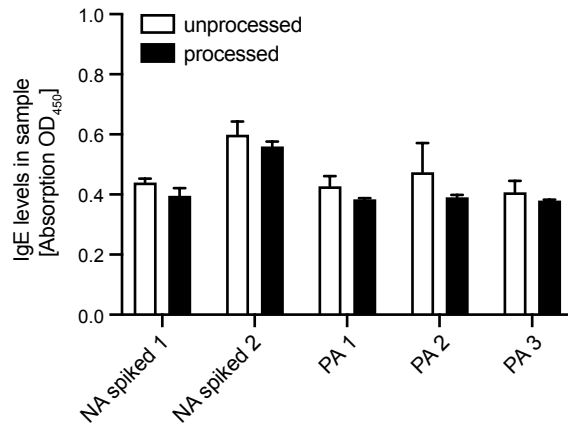

Figure S4

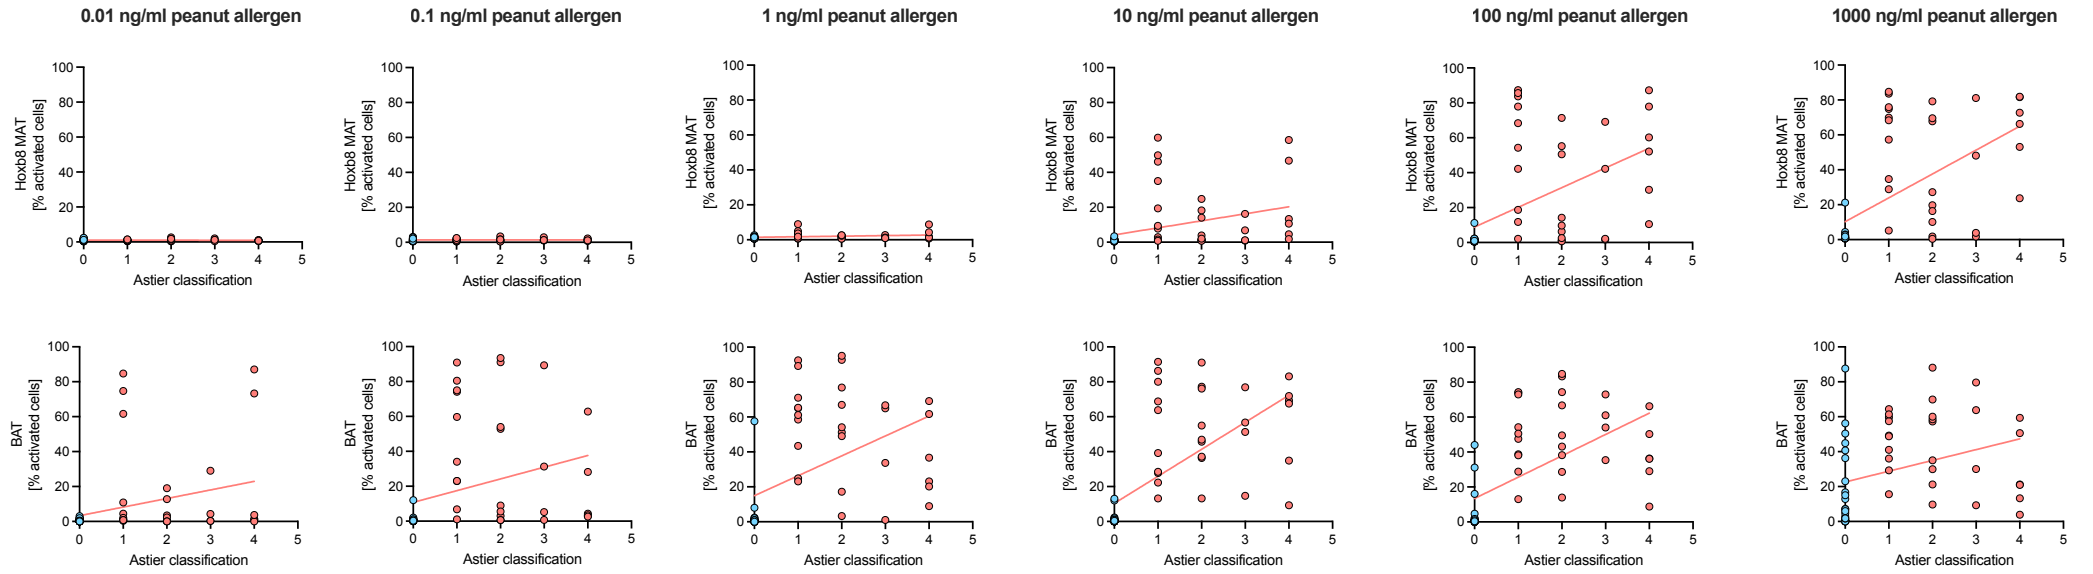

Figure S5

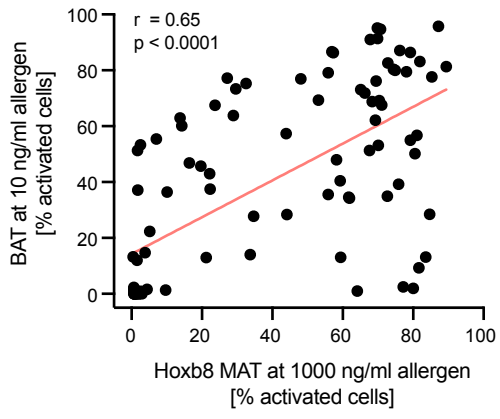

Supplement: ALL-80-215-s002.pdf [file ALL-80-215-s002.pdf]
